# Supplementary material for: Transgender Youth Referred to Clinics for Gender-Affirming Medical Care in Canada
Source: Oxford University Press journal article supplement (doi:10.1542/peds.2020-047266), 2021-10-07
Supplement: supplementarydata.pdf [file supplementarydata.pdf]

# Supplementary Online Content

Bauer GR, Pacaud D, Couch R, Metzger DL, Gale L, Gotovac S, Mokashi A, Feder S, Raiche J, Speechley KN, Newhook JT, Ghosh S, Sansfaçon AP, Susset F, Lawson M, for the Trans Youth CAN! Research Team. **Transgender Youth Referred to Clinics for Gender-affirming Medical Care in Canada.** *Pediatrics* 2021.

|                                                    |   |
|----------------------------------------------------|---|
| eTable 1. Supplemental Measures Descriptions ..... | 2 |
| Sociodemographics.....                             | 2 |
| Gender .....                                       | 2 |
| Growth Parameters .....                            | 2 |
| Physical and Mental Health.....                    | 3 |
| Social Context .....                               | 3 |
| Clinical Visit Outcome .....                       | 4 |
| eMethods. Sample Weighting Methods .....           | 5 |
| Trans Youth CAN! Study Survey Weights .....        | 5 |
| Derivation .....                                   | 5 |
| Confirmation .....                                 | 6 |
| eReferences .....                                  | 7 |

This supplementary material has been provided by the authors to give readers additional information about their work.

eTable 1. Supplemental Measures Descriptions

| Variable                                      | Measurement                                                                                                                                                                                                                                                                                                                                     | Time Frame  | Data Source     |
|-----------------------------------------------|-------------------------------------------------------------------------------------------------------------------------------------------------------------------------------------------------------------------------------------------------------------------------------------------------------------------------------------------------|-------------|-----------------|
| <b>Sociodemographics</b>                      |                                                                                                                                                                                                                                                                                                                                                 |             |                 |
| Age                                           | Age in years                                                                                                                                                                                                                                                                                                                                    | Current     | Youth interview |
| Ethnoracial category                          | Coded from youth report of immigration background, Indigenous identity, and ethnoracial background into 3 mutually exclusive categories: Indigenous; non-Indigenous visible minority (based on Statistics Canada definition), non-Indigenous white                                                                                              | Current     | Youth interview |
| Immigration background                        | Survey items asking if an immigrant to Canada, and if parent(s) are immigrant(s)                                                                                                                                                                                                                                                                | Life course | Youth interview |
| Living environment                            | Multiple choice question asking if they live in a city, suburb, or rural area                                                                                                                                                                                                                                                                   | Current     | Youth interview |
| Province or territory                         | Coded from first letter of youth's postal code                                                                                                                                                                                                                                                                                                  | Current     | Clinic records  |
| <b>Gender</b>                                 |                                                                                                                                                                                                                                                                                                                                                 |             |                 |
| Gender identity category                      | Survey item asking to select one of: "male/primarily a boy," "female/primarily a girl," or "non-binary or something other than male or female"                                                                                                                                                                                                  | Current     | Youth interview |
| Gender identity                               | Self-reported verbatim as text                                                                                                                                                                                                                                                                                                                  | Current     | Youth interview |
| Age realized gender issues                    | Self-reported age realized gender was different from what others were calling them                                                                                                                                                                                                                                                              | Life course | Youth interview |
| Time since first aware of gender              | Subtracted age realized gender issues from age at enrolment clinic visit                                                                                                                                                                                                                                                                        | Life course | Youth interview |
| Youth living in identified gender             | Survey item asking if they live in their identified gender "all of the time," "some of the time," or "none of the time"                                                                                                                                                                                                                         | Current     | Youth interview |
| Age started living in identified gender       | Self-reported age started living in their gender either all of the time or some of the time                                                                                                                                                                                                                                                     | Life course | Youth interview |
| Legal changes to name and/or gender marker    | Two items asking if legally changed their name and their birth certificate gender marker, with response options of "yes," "no," or "it's in process"                                                                                                                                                                                            | Life course | Youth interview |
| Discussed gender, prior to clinic             | Checklist of types of professional and support persons the youth or family met with to discuss the youth's gender                                                                                                                                                                                                                               | Life course | Parent survey   |
| <b>Growth Parameters</b>                      |                                                                                                                                                                                                                                                                                                                                                 |             |                 |
| Z-scores for weight-, height- and BMI-for-age | Z-scores were calculated from height and weight measures for all participants using both male and female growth curves to reflect assigned and identified gender, using WHO Growth Charts for Canada, 2014 revision; <sup>1</sup> Z-scores represent number of standard deviations from mean in comparison with youth of a specific age and sex | Current     | Clinic records  |

| Variable                                | Measurement                                                                                                                                                                                                                  | Time Frame               | Data Source     |
|-----------------------------------------|------------------------------------------------------------------------------------------------------------------------------------------------------------------------------------------------------------------------------|--------------------------|-----------------|
| <b>Physical and Mental Health</b>       |                                                                                                                                                                                                                              |                          |                 |
| Overall physical and mental health      | Two items from the Canadian Community Health Survey (CCHS) <sup>2</sup> asking youth to rate their general physical health and their general mental health on a 5-point response scale from “poor” to “excellent”            | Past 3 months            | Youth interview |
| Depression                              | 5-item Modified Depression Scale, dichotomized to code probable depression for participants reporting a frequency of “often” or “always” to 4 or 5 items <sup>3</sup>                                                        | Past 30 days             | Youth interview |
| Anxiety                                 | 5-item Overall Anxiety Severity and Impairment Score (OASIS), <sup>4</sup> with a cut-point of $\geq 8$ used for probable anxiety disorder. <sup>5</sup>                                                                     | Past week                | Youth interview |
| Self-harm                               | Five “yes/no” items on intentional harm or injury: 2 items on direct (e.g., cutting, burning) or indirect (e.g. preventing wounds from healing) skin injury, 2 on injury to breasts or genitals, and 1 for other self-injury | Past 12 months           | Youth interview |
| Smoking                                 | Self-reported, sometimes or daily smoking tobacco                                                                                                                                                                            | Current                  | Youth interview |
| Vaping                                  | Self-reported, sometimes or daily vaping                                                                                                                                                                                     | Current                  | Youth interview |
| Binge drinking                          | Self-reported, weekly or more often binge drinking of 5+ alcoholic drinks per occasion                                                                                                                                       | Past 12 months           | Youth interview |
| Marijuana use                           | Self-reported, any past-year use                                                                                                                                                                                             | Past 12 months           | Youth interview |
| Other drug use                          | Self-reported, including non-prescribed prescription medications, any past-year use                                                                                                                                          | Past 12 months           | Youth interview |
| Suicidal ideation and attempts          | CCHS <sup>2</sup> items asking if ever seriously considered and if attempted to commit suicide or take their own life, with follow-up asking if occurred in the last 12 months                                               | Lifetime; past 12 months | Youth interview |
| Physical and/or mental health diagnoses | Report of any pre-existing or current physical or mental health diagnoses                                                                                                                                                    | Current                  | Clinic records  |
| <b>Social Context</b>                   |                                                                                                                                                                                                                              |                          |                 |
| School situation                        | Two survey items, one on whether in public school, private school, home-school, or not enrolled in school, and one on whether they are enrolled in a religious school                                                        | Current                  | Youth interview |
| Living situation                        | Survey item asking youth to indicate living with one of: birth/adoptive/stepparents, foster family, group home, other relatives, with friends, by themselves                                                                 | Current                  | Youth interview |
| Had to move                             | “Yes/no” item asking if ever needed to move out of a home because others had issues with their gender                                                                                                                        | Life course              | Youth interview |

| Variable                                                | Measurement                                                                                                                                                                                                                                                                                                                                                    | Time Frame     | Data Source     |
|---------------------------------------------------------|----------------------------------------------------------------------------------------------------------------------------------------------------------------------------------------------------------------------------------------------------------------------------------------------------------------------------------------------------------------|----------------|-----------------|
| Avoidance of group spaces                               | Summed from a checklist of types of spaces that youth had avoided for “fear of being harassed, read as trans, or being outed”, e.g. transit or travelling, stores and restaurants, community centers, events, schools, locker rooms, washrooms, outdoor spaces, religious institutions, private homes                                                          | Life course    | Youth interview |
| Food insecurity                                         | 1 item adapted from the CCHS <sup>2</sup> on availability of food eaten in the household: “always enough to eat,” “sometimes not enough to eat,” or “often not enough to eat”                                                                                                                                                                                  | Past 12 months | Youth interview |
| Low-income measure                                      | Poverty was calculated as above or below the Statistics Canada Low-Income Measure Before Taxes (LIM) <sup>6</sup> based on before-tax household income (mid-point of each \$10,000 range) and the number of people supported on that income; missing for youth without a parent participant or not living at least part-time with the parent participant       | Past 12 months | Parent survey   |
| Deprivation                                             | 5 items capturing frequency of access to 5 essential resources: school supplies; internet (at home or school); season-appropriate clothing; clothing essentials (like socks and underwear); and reliable transportation (either care or transit); coded to indicate number of resources to which the youth always had access                                   | Past 12 months | Youth interview |
| Parental support for youth’s gender identity/expression | Survey items asked how supportive each of up to 4 separate parent figures (biological, step, foster, other) was of their gender identity/expression, with a 4-point response scale from not at all to very supportive; coded into 3 categories of all parents “very supportive”, mixed/moderate support, and all parents “not at all” or “not very” supportive | Current        | Youth interview |
| External stressors on the family                        | Summed from the Stressors on Families of Trans Youth Checklist (SFTYC) <sup>7</sup> capturing 16 types of trans-specific family stressors, e.g., child welfare investigation, other family not speaking to your family, or having to defend right to participate in activities, because of reactions to the youth’s gender                                     | Life course    | Youth interview |
| Sources of support                                      | Checklist of types of people who provided support (not specific to gender support), e.g. types of parent(s), family members, friends, people from school, health care providers, communities                                                                                                                                                                   | Current        | Youth interview |
| <b>Clinical Visit Outcome</b>                           |                                                                                                                                                                                                                                                                                                                                                                |                |                 |
| Medication prescription                                 | Extracted if a medication was prescribed or not (yes/no), and the medications prescribed                                                                                                                                                                                                                                                                       | Current        | Clinic records  |
| Reason for no prescription                              | Youth, parent and provider reasons for no prescription were extracted as text                                                                                                                                                                                                                                                                                  | Current        | Clinic records  |

## eMethods. Sample Weighting Methods

### Trans Youth CAN! Study Survey Weights

Weighting is based on youth participants (n=174) recruited at 10 medical clinics in Canada. Recruitment starts were staggered across clinics but data collection was completed on the same date, creating different lengths of recruitment time for each clinic. To make results more generalizable to the population of youth who are patients at these clinics, we assigned weights to each youth participant (and corresponding parent/caregiver participant) to adjust for differential recruitment periods.

We have participants  $i = 1$  to 174 in clinics  $j = 1$  to 10

$w_{ij}$  = weight for each participant  $i$  in clinic  $j$

$N$  = total number of youth participants

$N_j$  = total number of youth participants in clinic  $j$

$m_j$  = months of data collection for clinic  $j$

$$\text{Eq 1.} \quad w_{ij} = \frac{N}{m_j(\sum_{j=1}^{10} \frac{N_j}{m_j})}$$

Equation 1 is the formula for our sample weights  $w_{ij}$ . Weights will be the same for all participants within a clinic, as there is no individual component to this weighting. Weighting is to remove the effect of differential lengths of recruitment. The sum of all weights will equal the sample size (n=174).

### Derivation

For each clinic, the weighted proportion of participants needs to equal the mean monthly recruitment for their site divided by the sum of average monthly recruitments for the 10 clinics (for active recruitment months at each clinic only), which is shown in Equation 2. In other words, if a study recruited 30/month with all sites at an average level of active recruitment, and one site averaged 6/month over its own active recruitment period, that site should end up with 20% of the total weighted sample.

$$\text{Eq 2.} \quad \frac{N_j(w_{ij})}{N} = \frac{N_j/m_j}{\sum_{j=1}^{10} \frac{N_j}{m_j}}$$

The denominator (Equation 3) represents the total recruits/month across all 10 sites in a hypothetical average month where all clinics were recruiting.

$$\text{Eq 3.} \quad \sum_{j=1}^{10} \frac{N_j}{m_j}$$

In solving Equation 2 for  $w_{ij}$  we get:

$$\text{Eq 4.} \quad w_{ij} = \left(\frac{N}{N_j}\right) \left(\frac{N_j}{m_j}\right) \left(\frac{1}{\sum_{j=1}^{10} \frac{N_j}{m_j}}\right) = \frac{N}{m_j(\sum_{j=1}^{10} \frac{N_j}{m_j})}$$

## Confirmation

Weights correctly sum to 174. Total recruits/month across all sites in a hypothetical average month where all clinics are recruiting at average monthly levels = 13.6147. Note that number of youth in the clinic ( $N_i$ ) is not part of the final weight formula, but is part of the estimation as the weights will be applied to a different number of participants from each clinic. Using the numbers below, we can confirm that Equation 2 holds true.

| Clinic | # youth | Month, first recruit | # recruitment months | Recruits per month | Weight      |
|--------|---------|----------------------|----------------------|--------------------|-------------|
| 1      | 67      | Sep-17               | 22                   | 3.04545            | 0.580923213 |
| 2      | 3       | Feb-18               | 17                   | 0.17647            | 0.751782982 |
| 3      | 18      | Feb-18               | 17                   | 1.05882            | 0.751782982 |
| 4      | 12      | Mar-18               | 16                   | 0.75000            | 0.798769418 |
| 5      | 14      | May-18               | 14                   | 1.00000            | 0.912879335 |
| 6      | 16      | Jun-18               | 13                   | 1.23077            | 0.983100822 |
| 7      | 11      | Oct-18               | 9                    | 1.22222            | 1.420034521 |
| 8      | 6       | Nov-18               | 8                    | 0.75000            | 1.597538836 |
| 9      | 5       | Dec-18               | 7                    | 0.71429            | 1.825758669 |
| 10     | 22      | Jan-19               | 6                    | 3.66667            | 2.130051781 |
| Total  | 174     |                      | 129                  | 13.61469           |             |

## eReferences

1. Rodd C, Metzger DL, Sharma A. Extending World Health Organization weight-for-age reference curves to older children. *BMC Pediatr.* 2014;14(1):32.
2. Statistics Canada. Canadian Community Health Survey - Annual Component (CCHS), 2017. <https://www23.statcan.gc.ca/imdb/p2SV.pl?Function=getSurvey&Id=329241>. Accessed May 25, 2020.
3. Dunn EC, Johnson RM, Green JG. The Modified Depression Scale (MDS): A brief, no-cost assessment tool to estimate the level of depressive symptoms in students and schools. *School Ment Health.* 2012;4(1):34-45.
4. Campbell-Sills L, Norman SB, Craske MG, et al. Validation of a brief measure of anxiety-related severity and impairment: The Overall Anxiety Severity and Impairment Scale (OASIS). *J Affect Disord.* 2009;112(1-3):92-101.
5. Norman SB, Campbell-Sills L, Hitchcock CA, et al. Psychometrics of a brief measure of anxiety to detect severity and impairment: The Overall Anxiety Severity and Impairment Scale (OASIS). *J Psychiatr Res.* 2011;45(2):262-268.
6. Statistics Canada. Low income measure (LIM) thresholds by income source and household size. Table: 11-10-0232-01 (formerly CANSIM 206-0091). <https://www150.statcan.gc.ca/t1/tbl1/en/tv.action?pid=1110023201>. Accessed May 25, 2020.
7. Bauer G, Churchill S, Ducharme J, et al. *Stressors on Families of Trans Youth Checklist (SFTYC)*. [https://transyouthcan.ca/wp-content/uploads/2018/05/Stressors-on-Families-of-Trans-Youth-Checklist-vSHARE\\_EN.pdf](https://transyouthcan.ca/wp-content/uploads/2018/05/Stressors-on-Families-of-Trans-Youth-Checklist-vSHARE_EN.pdf). Accessed May 25, 2020.
